# Supplementary material for: Synthesis and enzymatic incorporation of modified deoxyuridine triphosphates
Source: Royal Society of Chemistry journal article supplement (doi:10.1039/b906956a), 2009-01-01
Supplement: b906956a.pdf [file b906956a.pdf]

## **Supporting Information**

### **Synthesis and enzymatic incorporation of modified deoxyuridine triphosphates**

Vinciane Borsenberger, Mikiembo Kukwikila, Stefan Howorka\*

*Department of Chemistry, University College London, Christopher Ingold Building, 20 Gordon Street,  
London WC1H 0AJ, UK*

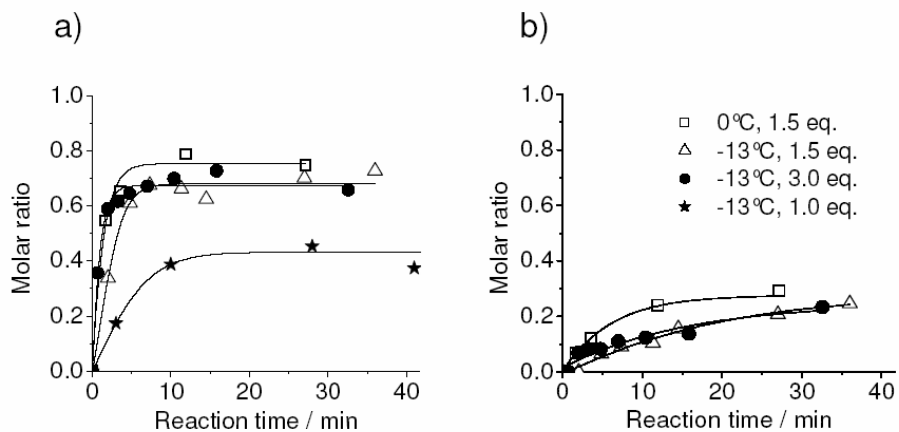

**Figure 1.** Kinetic plots for the appearance of (a) the 5'-monophosphate and (b) the 5',3'-diphosphate derivative of **1** in dependence of reaction temperature and the molar equivalents of POCl<sub>3</sub> in course of the Yoshikawa procedure. Symbols for (a) are the same as in (b). Data for the graphs were derived from HPLC analysis.
